# Supplementary material
Source: PubMed Central journal article supplement (PMC4174946)
Supplement: 3bea5af45f7c1132a8f44d15e8d30342_genetics.114.165845-5.pdf [file 3bea5af45f7c1132a8f44d15e8d30342_genetics.114.165845-5.pdf]

**Table S2 Marker information including physical position, genetic position, percent maize, teosinte, heterozygous, and missing.**

| Marker    | Physical Start | Physical End | Genetic Position | Percent Maize | Percent Teosinte | Percent Heterozygous | Percent Missing |
|-----------|----------------|--------------|------------------|---------------|------------------|----------------------|-----------------|
| umc2036   | 6985542        | 6985695      | 0.00             | 49.2%         | 48.1%            | 2.3%                 | 0.4%            |
| bnlg565   | 8492860        | 8492883      | 6.54             | 48.5%         | 47.3%            | 3.8%                 | 0.0%            |
| bnlg105   | 13812577       | 13812596     | 20.90            | 36.9%         | 51.2%            | 0.4%                 | 11.2%           |
| phi008    | 14072711       | 14072799     | 21.54            | 46.9%         | 51.2%            | 1.5%                 | 0.0%            |
| umc2293   | 15110042       | 15110066     | 25.26            | 48.1%         | 49.6%            | 1.9%                 | 0.0%            |
| umc2060   | 16462679       | 16462822     | 27.79            | 48.1%         | 49.2%            | 1.9%                 | 0.4%            |
| bnlg1046  | 18701271       | 18701478     | 31.75            | 46.2%         | 49.6%            | 3.1%                 | 0.8%            |
| umc2035   | 23891636       | 23891586     | 42.17            | 51.5%         | 45.8%            | 2.3%                 | 0.0%            |
| umc1705   | 28196232       | 28196255     | 45.36            | 51.2%         | 45.8%            | 2.7%                 | 0.0%            |
| umc1056   | 32035997       | 32036018     | 48.10            | 51.2%         | 45.0%            | 3.5%                 | 0.0%            |
| umc2294   | 33783040       | 33783128     | 48.43            | 51.9%         | 44.6%            | 3.1%                 | 0.0%            |
| umc1935   | 51438478       | 51438621     | 53.24            | 49.2%         | 46.2%            | 4.2%                 | 0.0%            |
| umc1850   | 54416864       | 54416984     | 54.79            | 49.2%         | 45.8%            | 3.8%                 | 0.8%            |
| mmp58     | 74916757       | 74916904     | 61.98            | 48.1%         | 46.9%            | 4.2%                 | 0.4%            |
| GRM116761 | 82236265       | 82236067     | 63.55            | 48.1%         | 45.8%            | 5.0%                 | 0.8%            |
| umc2298   | 84800673       | 84800762     | 65.07            | 47.7%         | 47.3%            | 4.6%                 | 0.0%            |
| umc1110   | 84825350       | 84825468     | 65.39            | 47.3%         | 46.9%            | 5.4%                 | 0.0%            |
| umc1224   | 92368559       | 92368676     | 66.70            | 46.2%         | 48.5%            | 5.0%                 | 0.0%            |
| umc1283   | 111997810      | 111997925    | 67.52            | 46.9%         | 47.7%            | 5.0%                 | 0.0%            |
| bnlg1287  | 121583928      | 121584076    | 67.69            | 47.7%         | 47.7%            | 4.2%                 | 0.0%            |
| dupssr10  | 142483339      | 142483503    | 68.70            | 47.3%         | 48.5%            | 3.8%                 | 0.0%            |
| bnlg2323  | 151717740      | 151717922    | 74.26            | 47.7%         | 49.2%            | 1.5%                 | 1.2%            |
| ZHL0301   | 159447674      | 159447786    | 77.01            | 48.1%         | 49.2%            | 2.3%                 | 0.0%            |
| umc1348   | 166576570      | 166576708    | 81.83            | 46.5%         | 43.8%            | 5.8%                 | 3.5%            |
| umc1966   | 169230959      | 169231115    | 86.64            | 48.1%         | 46.2%            | 5.4%                 | 0.0%            |
