# Supplementary material
Source: PubMed Central journal article supplement (PMC4174946)
Supplement: 4cff657a2f5fbe9a7111339aa41fd2c9_genetics.114.165845-6.pdf [file 4cff657a2f5fbe9a7111339aa41fd2c9_genetics.114.165845-6.pdf]

**Table S1 RFLP Markers used during backcrossing of QTL mapping population.**

| Marker   | Chromosome | Marker    | Chromosome | Marker  | Chromosome |
|----------|------------|-----------|------------|---------|------------|
| bnl5.62  | 1          | umc121    | 3          | bnl7.71 | 5          |
| umc157   | 1          | php20042  | 3          | npi412  | 5          |
| umc37b   | 1          | umc42b    | 3          | umc54   | 5          |
| npi255   | 1          | umc161    | 3          | umc127b | 5          |
| BZ2      | 1          | umc18     | 3          | umc104a | 5          |
| bnl8.10  | 1          | TE1       | 3          | bnl6.29 | 6          |
| npi615   | 1          | bnl5.37   | 3          | umc65   | 6          |
| umc107   | 1          | bnl8.01   | 3          | umc21   | 6          |
| npi225   | 1          | umc60     | 3          | umc46   | 6          |
| bnl8.45  | 2          | bnl12.97  | 3          | umc132  | 6          |
| umc53    | 2          | php10080  | 3          | umc62   | 6          |
| npi320   | 2          | npi425    | 3          | npi114  | 8          |
| npi421   | 2          | umc2a     | 3          | bnl9.11 | 8          |
| umc6     | 2          | php20725  | 4          | umc117  | 8          |
| umc34    | 2          | umc19     | 4          | umc7    | 8          |
| umc134   | 2          | umc127a   | 4          | npi253  | 9          |
| umc131   | 2          | bnl10.17b | 4          | umc113  | 9          |
| umc2b    | 2          | umc15     | 4          | umc81   | 9          |
| umc5a    | 2          | bnl8.23   | 4          | umc95   | 9          |
| php20005 | 2          | bnl8.33   | 5          | bnl3.04 | 10         |
| umc122   | 2          | bnl6.25   | 5          | umc130  | 10         |
| umc49a   | 2          | umc90     | 5          | umc49b  | 10         |
| umc36    | 2          | umc27     | 5          | umc117b | 10         |
| umc32    | 3          | umc166    | 5          | bnl7.49 | 10         |
