# Supplementary material
Source: PubMed Central journal article supplement (PMC4174946)
Supplement: 5a12f7f9999e1dd7dcce3ab58bd9dbbd_genetics.114.165845-1.pdf [file 5a12f7f9999e1dd7dcce3ab58bd9dbbd_genetics.114.165845-1.pdf]

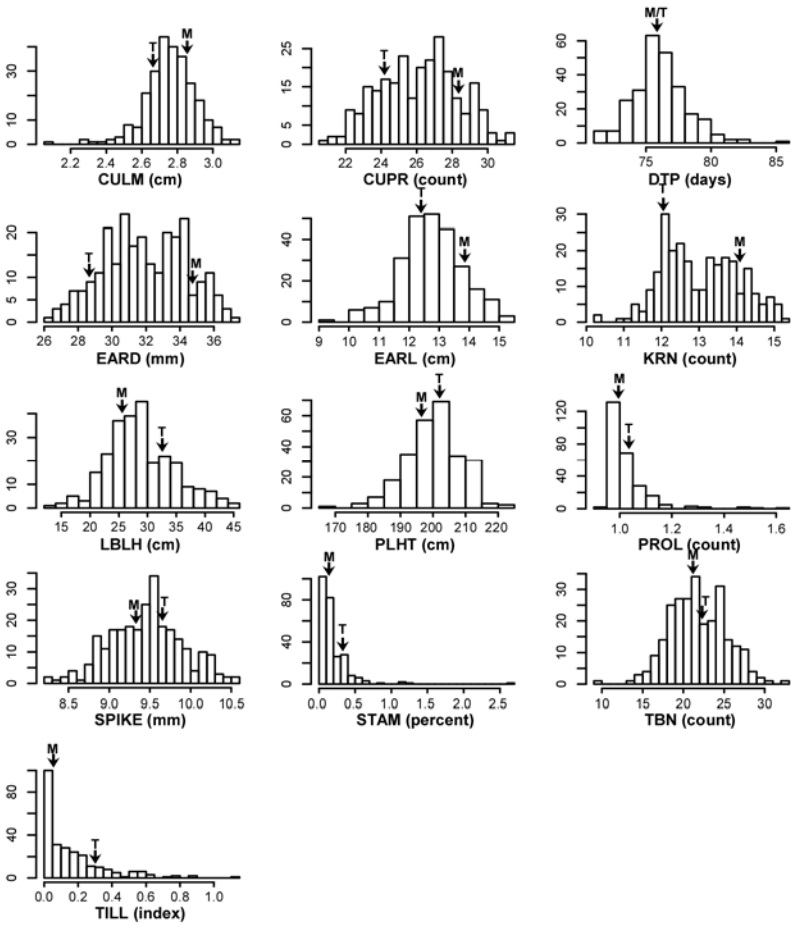

**Figure S1** Histograms of the least squared means for phenotyped traits from the QTL mapping population. Several of these distributions are approximately normal, but other traits take on an exponential distribution. The average least squared mean for NIRILs with 100% maize and teosinte genotypes is indicated with an arrow and “M” for maize and “T” for teosinte.

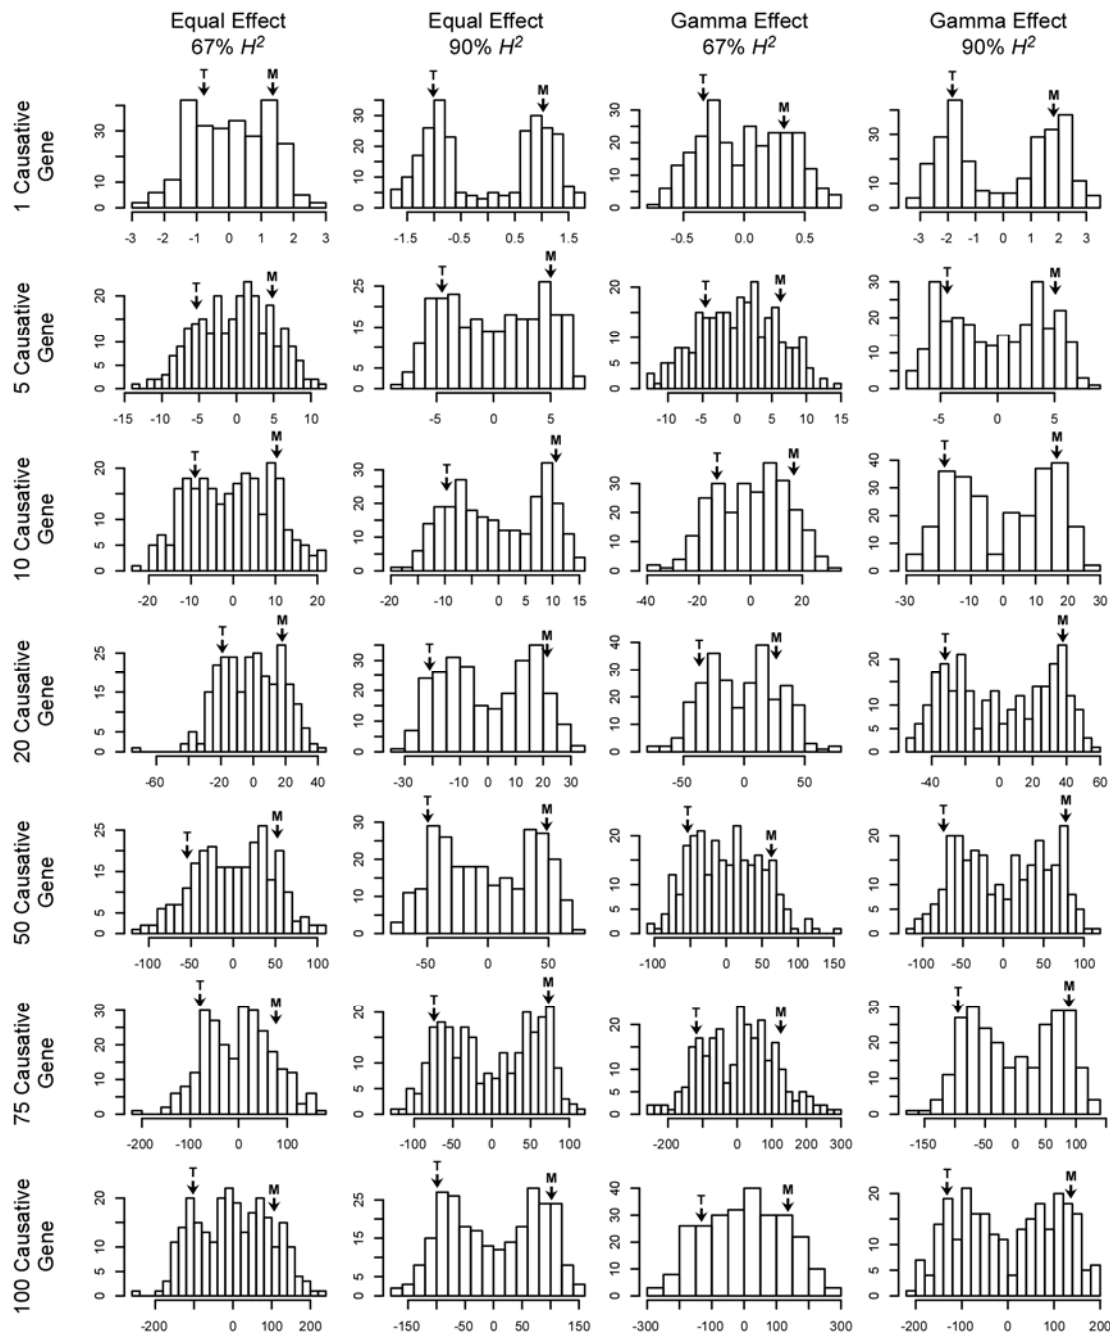

**Figure S2** Example histograms of simulated traits for several different conditions in terms of number of causative loci, effect size, and heritability. Histograms from traits with equal effects - 67% H<sup>2</sup>, equal effects - 90% H<sup>2</sup>, gamma distributed effect - 67% H<sup>2</sup> and gamma distributed effect - 90% H<sup>2</sup> are shown in different columns from left to right. Histograms from simulated traits with one, five, ten, twenty, fifty, seventy-five, and one hundred causative loci are shown from top to bottom. The average simulated phenotype value for NIRILs that are 100% maize and teosinte are indicated with arrows labeled by “M” for maize and “T” for teosinte.

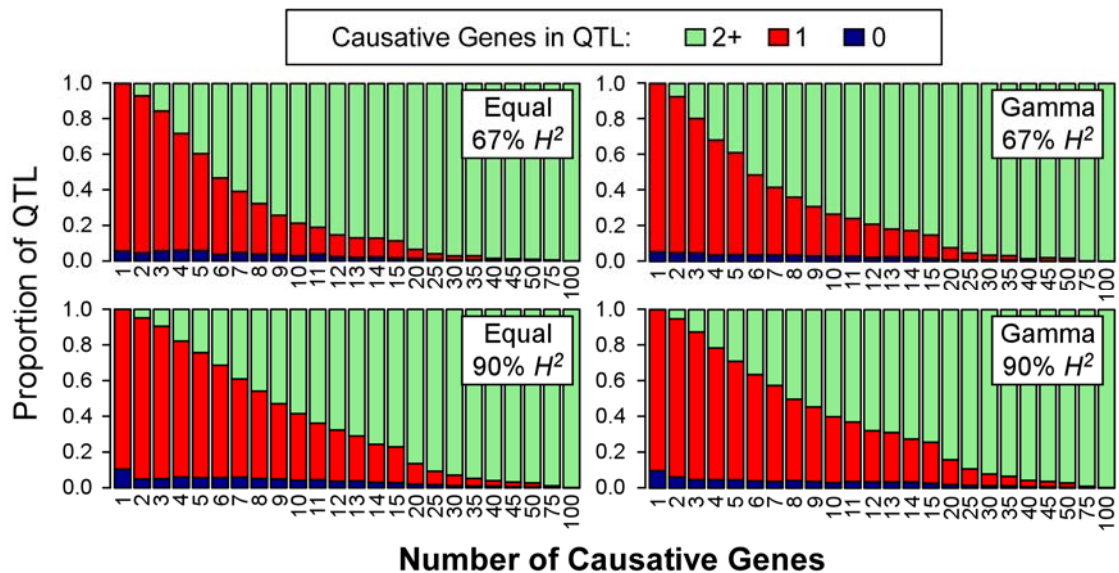

**Figure S3** Proportion of detected QTL with zero, one, or multiple causative genes in the 1.5 LOD support interval. As seen in the equal effect simulations, a high number of gamma distributed causative genes leads to detected QTL with multiple causative factors. There is a relatively high percentage of detected QTL in the simulations containing a single causative gene when few (less than 4) causative genes are simulated, but as the number of simulated causative genes increases we quickly lose the power to distinguish between closely linked causative genes and they become lumped into single detected QTL.

**File S1**

**Simulation R script and required secondary files (genotypes and gene names/positions)**

Available for download as a zip archive at <http://www.genetics.org/lookup/suppl/doi:10.1534/genetics.114.165845/-/DC1>

**Table S1 RFLP Markers used during backcrossing of QTL mapping population.**

| Marker   | Chromosome | Marker    | Chromosome | Marker  | Chromosome |
|----------|------------|-----------|------------|---------|------------|
| bnl5.62  | 1          | umc121    | 3          | bnl7.71 | 5          |
| umc157   | 1          | php20042  | 3          | npi412  | 5          |
| umc37b   | 1          | umc42b    | 3          | umc54   | 5          |
| npi255   | 1          | umc161    | 3          | umc127b | 5          |
| BZ2      | 1          | umc18     | 3          | umc104a | 5          |
| bnl8.10  | 1          | TE1       | 3          | bnl6.29 | 6          |
| npi615   | 1          | bnl5.37   | 3          | umc65   | 6          |
| umc107   | 1          | bnl8.01   | 3          | umc21   | 6          |
| npi225   | 1          | umc60     | 3          | umc46   | 6          |
| bnl8.45  | 2          | bnl12.97  | 3          | umc132  | 6          |
| umc53    | 2          | php10080  | 3          | umc62   | 6          |
| npi320   | 2          | npi425    | 3          | npi114  | 8          |
| npi421   | 2          | umc2a     | 3          | bnl9.11 | 8          |
| umc6     | 2          | php20725  | 4          | umc117  | 8          |
| umc34    | 2          | umc19     | 4          | umc7    | 8          |
| umc134   | 2          | umc127a   | 4          | npi253  | 9          |
| umc131   | 2          | bnl10.17b | 4          | umc113  | 9          |
| umc2b    | 2          | umc15     | 4          | umc81   | 9          |
| umc5a    | 2          | bnl8.23   | 4          | umc95   | 9          |
| php20005 | 2          | bnl8.33   | 5          | bnl3.04 | 10         |
| umc122   | 2          | bnl6.25   | 5          | umc130  | 10         |
| umc49a   | 2          | umc90     | 5          | umc49b  | 10         |
| umc36    | 2          | umc27     | 5          | umc117b | 10         |
| umc32    | 3          | umc166    | 5          | bnl7.49 | 10         |

**Table S2 Marker information including physical position, genetic position, percent maize, teosinte, heterozygous, and missing.**

| Marker    | Physical Start | Physical End | Genetic Position | Percent Maize | Percent Teosinte | Percent Heterozygous | Percent Missing |
|-----------|----------------|--------------|------------------|---------------|------------------|----------------------|-----------------|
| umc2036   | 6985542        | 6985695      | 0.00             | 49.2%         | 48.1%            | 2.3%                 | 0.4%            |
| bnlg565   | 8492860        | 8492883      | 6.54             | 48.5%         | 47.3%            | 3.8%                 | 0.0%            |
| bnlg105   | 13812577       | 13812596     | 20.90            | 36.9%         | 51.2%            | 0.4%                 | 11.2%           |
| phi008    | 14072711       | 14072799     | 21.54            | 46.9%         | 51.2%            | 1.5%                 | 0.0%            |
| umc2293   | 15110042       | 15110066     | 25.26            | 48.1%         | 49.6%            | 1.9%                 | 0.0%            |
| umc2060   | 16462679       | 16462822     | 27.79            | 48.1%         | 49.2%            | 1.9%                 | 0.4%            |
| bnlg1046  | 18701271       | 18701478     | 31.75            | 46.2%         | 49.6%            | 3.1%                 | 0.8%            |
| umc2035   | 23891636       | 23891586     | 42.17            | 51.5%         | 45.8%            | 2.3%                 | 0.0%            |
| umc1705   | 28196232       | 28196255     | 45.36            | 51.2%         | 45.8%            | 2.7%                 | 0.0%            |
| umc1056   | 32035997       | 32036018     | 48.10            | 51.2%         | 45.0%            | 3.5%                 | 0.0%            |
| umc2294   | 33783040       | 33783128     | 48.43            | 51.9%         | 44.6%            | 3.1%                 | 0.0%            |
| umc1935   | 51438478       | 51438621     | 53.24            | 49.2%         | 46.2%            | 4.2%                 | 0.0%            |
| umc1850   | 54416864       | 54416984     | 54.79            | 49.2%         | 45.8%            | 3.8%                 | 0.8%            |
| mmp58     | 74916757       | 74916904     | 61.98            | 48.1%         | 46.9%            | 4.2%                 | 0.4%            |
| GRM116761 | 82236265       | 82236067     | 63.55            | 48.1%         | 45.8%            | 5.0%                 | 0.8%            |
| umc2298   | 84800673       | 84800762     | 65.07            | 47.7%         | 47.3%            | 4.6%                 | 0.0%            |
| umc1110   | 84825350       | 84825468     | 65.39            | 47.3%         | 46.9%            | 5.4%                 | 0.0%            |
| umc1224   | 92368559       | 92368676     | 66.70            | 46.2%         | 48.5%            | 5.0%                 | 0.0%            |
| umc1283   | 111997810      | 111997925    | 67.52            | 46.9%         | 47.7%            | 5.0%                 | 0.0%            |
| bnlg1287  | 121583928      | 121584076    | 67.69            | 47.7%         | 47.7%            | 4.2%                 | 0.0%            |
| dupssr10  | 142483339      | 142483503    | 68.70            | 47.3%         | 48.5%            | 3.8%                 | 0.0%            |
| bnlg2323  | 151717740      | 151717922    | 74.26            | 47.7%         | 49.2%            | 1.5%                 | 1.2%            |
| ZHL0301   | 159447674      | 159447786    | 77.01            | 48.1%         | 49.2%            | 2.3%                 | 0.0%            |
| umc1348   | 166576570      | 166576708    | 81.83            | 46.5%         | 43.8%            | 5.8%                 | 3.5%            |
| umc1966   | 169230959      | 169231115    | 86.64            | 48.1%         | 46.2%            | 5.4%                 | 0.0%            |
