# Supplementary material
Source: PubMed Central journal article supplement (PMC4174946)
Supplement: 992d38c1c8e10747178535b08ca370ff_genetics.114.165845-4.pdf [file 992d38c1c8e10747178535b08ca370ff_genetics.114.165845-4.pdf]

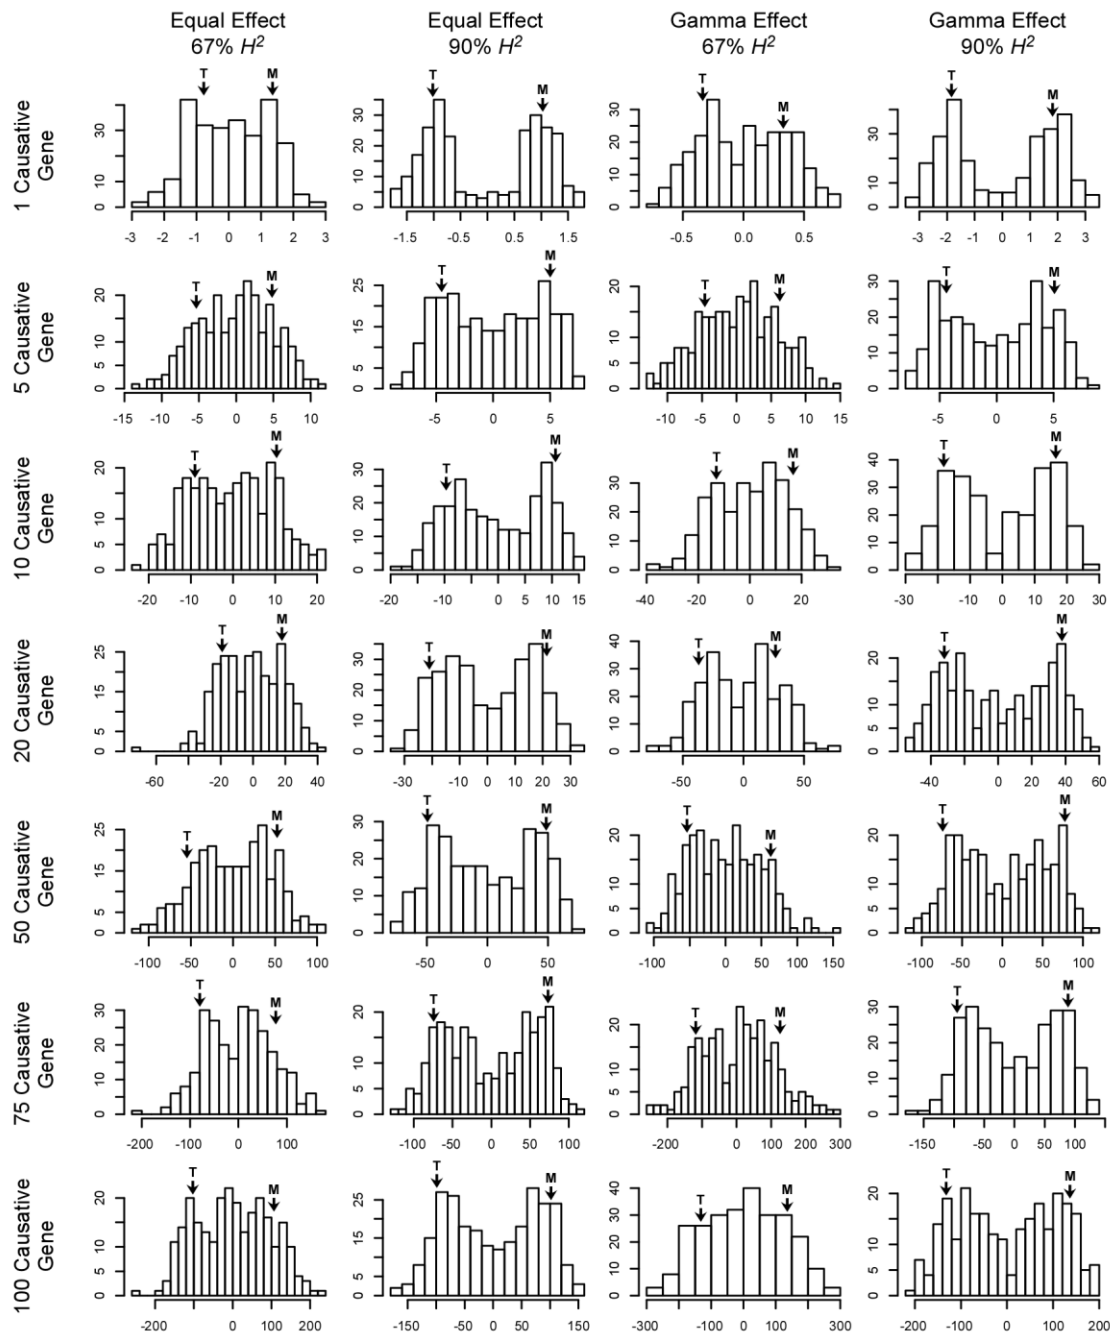

**Figure S2** Example histograms of simulated traits for several different conditions in terms of number of causative loci, effect size, and heritability. Histograms from traits with equal effects - 67% H<sup>2</sup>, equal effects - 90% H<sup>2</sup>, gamma distributed effect - 67% H<sup>2</sup> and gamma distributed effect - 90% H<sup>2</sup> are shown in different columns from left to right. Histograms from simulated traits with one, five, ten, twenty, fifty, seventy-five, and one hundred causative loci are shown from top to bottom. The average simulated phenotype value for NIRILs that are 100% maize and teosinte are indicated with arrows labeled by “M” for maize and “T” for teosinte.
