# Supplementary material
Source: PubMed Central journal article supplement (PMC4174946)
Supplement: ee0da66e76a76f3faee36c4117a30a8d_genetics.114.165845-7.pdf [file ee0da66e76a76f3faee36c4117a30a8d_genetics.114.165845-7.pdf]

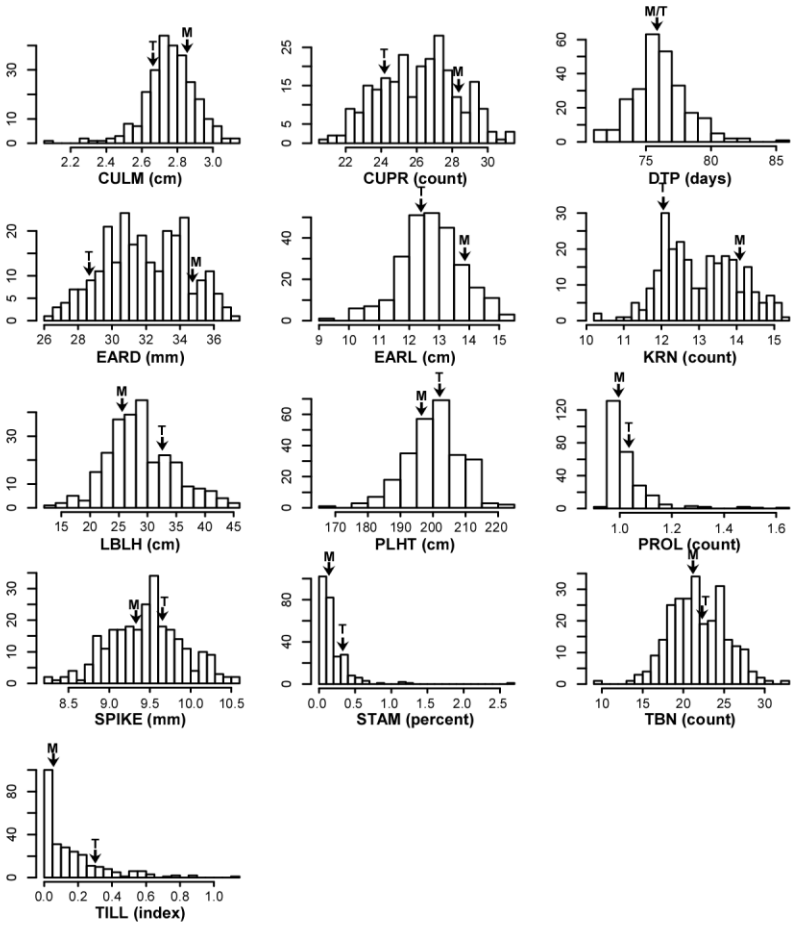

**Figure S1** Histograms of the least squared means for phenotyped traits from the QTL mapping population. Several of these distributions are approximately normal, but other traits take on an exponential distribution. The average least squared mean for NIRILs with 100% maize and teosinte genotypes is indicated with an arrow and “M” for maize and “T” for teosinte.
